# Supplementary material
Source: PubMed Central journal article supplement (PMC2083641)
Supplement: NIHMS30374-supplement-02.pdf [file NIHMS30374-supplement-02.pdf]

rsd.msfc MSF: 184 Type: P Check: 9999 ..

|                |          |             |              |
|----------------|----------|-------------|--------------|
| Name: 01790428 | Len: 183 | Check: 9999 | Weight: 1.00 |
| Name: 09951566 | Len: 183 | Check: 9999 | Weight: 1.00 |
| Name: 91074372 | Len: 183 | Check: 9999 | Weight: 1.00 |
| Name: 75236725 | Len: 183 | Check: 9999 | Weight: 1.00 |
| Name: 26111197 | Len: 183 | Check: 9999 | Weight: 1.00 |
| Name: 24054573 | Len: 183 | Check: 9999 | Weight: 1.00 |
| Name: 15834172 | Len: 183 | Check: 9999 | Weight: 1.00 |
| Name: 89110043 | Len: 183 | Check: 9999 | Weight: 1.00 |
| Name: 85676074 | Len: 183 | Check: 9999 | Weight: 1.00 |
| Name: 00396334 | Len: 183 | Check: 9999 | Weight: 1.00 |
| Name: 73857966 | Len: 183 | Check: 9999 | Weight: 1.00 |
| Name: 30042983 | Len: 183 | Check: 9999 | Weight: 1.00 |
| Name: 13364394 | Len: 183 | Check: 9999 | Weight: 1.00 |
| Name: 75514762 | Len: 183 | Check: 9999 | Weight: 1.00 |
| Name: 75255492 | Len: 183 | Check: 9999 | Weight: 1.00 |
| Name: 75238536 | Len: 183 | Check: 9999 | Weight: 1.00 |
| Name: 75228134 | Len: 183 | Check: 9999 | Weight: 1.00 |
| Name: 75208793 | Len: 183 | Check: 9999 | Weight: 1.00 |
| Name: 75197859 | Len: 183 | Check: 9999 | Weight: 1.00 |
| Name: 75188725 | Len: 183 | Check: 9999 | Weight: 1.00 |
| Name: 75179644 | Len: 183 | Check: 9999 | Weight: 1.00 |
| Name: 83584825 | Len: 183 | Check: 9999 | Weight: 1.00 |
| Name: 81247748 | Len: 183 | Check: 9999 | Weight: 1.00 |
| Name: 12518924 | Len: 183 | Check: 9999 | Weight: 1.00 |
| Name: 81242977 | Len: 183 | Check: 9999 | Weight: 1.00 |
| Name: 83569013 | Len: 183 | Check: 9999 | Weight: 1.00 |
| Name: 16422723 | Len: 183 | Check: 9999 | Weight: 1.00 |
| Name: 06960347 | Len: 183 | Check: 9999 | Weight: 1.00 |
| Name: 56130248 | Len: 183 | Check: 9999 | Weight: 1.00 |
| Name: 16762292 | Len: 183 | Check: 9999 | Weight: 1.00 |
| Name: 29139415 | Len: 183 | Check: 9999 | Weight: 1.00 |
| Name: 16504596 | Len: 183 | Check: 9999 | Weight: 1.00 |
| Name: 62130249 | Len: 183 | Check: 9999 | Weight: 1.00 |
| Name: 49609720 | Len: 183 | Check: 9999 | Weight: 1.00 |
| Name: 50119194 | Len: 183 | Check: 9999 | Weight: 1.00 |
| Name: 77957004 | Len: 183 | Check: 9999 | Weight: 1.00 |
| Name: 77960644 | Len: 183 | Check: 9999 | Weight: 1.00 |
| Name: 77976252 | Len: 183 | Check: 9999 | Weight: 1.00 |
| Name: 85058115 | Len: 183 | Check: 9999 | Weight: 1.00 |
| Name: 84778635 | Len: 183 | Check: 9999 | Weight: 1.00 |
| Name: 77972241 | Len: 183 | Check: 9999 | Weight: 1.00 |
| Name: 51587928 | Len: 183 | Check: 9999 | Weight: 1.00 |
| Name: 51594646 | Len: 183 | Check: 9999 | Weight: 1.00 |
| Name: 21957190 | Len: 183 | Check: 9999 | Weight: 1.00 |
| Name: 15981653 | Len: 183 | Check: 9999 | Weight: 1.00 |
| Name: 16123874 | Len: 183 | Check: 9999 | Weight: 1.00 |

Name: 77631242 Len: 183 Check: 9999 Weight: 1.00  
Name: 45437720 Len: 183 Check: 9999 Weight: 1.00  
Name: 89103193 Len: 183 Check: 9999 Weight: 1.00  
Name: 77633255 Len: 183 Check: 9999 Weight: 1.00  
Name: 88816583 Len: 183 Check: 9999 Weight: 1.00  
Name: 76876713 Len: 183 Check: 9999 Weight: 1.00  
Name: 77361802 Len: 183 Check: 9999 Weight: 1.00  
Name: 94426242 Len: 183 Check: 9999 Weight: 1.00  
Name: 68516055 Len: 183 Check: 9999 Weight: 1.00  
Name: 78361812 Len: 183 Check: 9999 Weight: 1.00  
Name: 24345897 Len: 183 Check: 9999 Weight: 1.00  
Name: 68519674 Len: 183 Check: 9999 Weight: 1.00  
Name: 78511884 Len: 183 Check: 9999 Weight: 1.00  
Name: 82405098 Len: 183 Check: 9999 Weight: 1.00  
Name: 78504897 Len: 183 Check: 9999 Weight: 1.00  
Name: 77869348 Len: 183 Check: 9999 Weight: 1.00  
Name: 77811156 Len: 183 Check: 9999 Weight: 1.00  
Name: 82718938 Len: 183 Check: 9999 Weight: 1.00  
Name: 67087234 Len: 183 Check: 9999 Weight: 1.00  
Name: 91713833 Len: 183 Check: 9999 Weight: 1.00  
Name: 56180418 Len: 183 Check: 9999 Weight: 1.00  
Name: 89048923 Len: 183 Check: 9999 Weight: 1.00  
Name: 90437549 Len: 183 Check: 9999 Weight: 1.00  
Name: 09654744 Len: 183 Check: 9999 Weight: 1.00  
Name: 75829161 Len: 183 Check: 9999 Weight: 1.00  
Name: 75828315 Len: 183 Check: 9999 Weight: 1.00  
Name: 75821890 Len: 183 Check: 9999 Weight: 1.00  
Name: 75818927 Len: 183 Check: 9999 Weight: 1.00  
Name: 75814786 Len: 183 Check: 9999 Weight: 1.00  
Name: 83637095 Len: 183 Check: 9999 Weight: 1.00  
Name: 68347580 Len: 183 Check: 9999 Weight: 1.00  
Name: 24981546 Len: 183 Check: 9999 Weight: 1.00  
Name: 82715084 Len: 183 Check: 9999 Weight: 1.00  
Name: 95108439 Len: 183 Check: 9999 Weight: 1.00  
Name: 90332615 Len: 183 Check: 9999 Weight: 1.00  
Name: 85694269 Len: 183 Check: 9999 Weight: 1.00  
Name: 89952826 Len: 183 Check: 9999 Weight: 1.00  
Name: 69166473 Len: 183 Check: 9999 Weight: 1.00  
Name: 49080780 Len: 183 Check: 9999 Weight: 1.00  
Name: 71556785 Len: 183 Check: 9999 Weight: 1.00  
Name: 28850608 Len: 183 Check: 9999 Weight: 1.00  
Name: 88772902 Len: 183 Check: 9999 Weight: 1.00  
Name: 88776135 Len: 183 Check: 9999 Weight: 1.00  
Name: 90311708 Len: 183 Check: 9999 Weight: 1.00  
Name: 46914939 Len: 183 Check: 9999 Weight: 1.00  
Name: 54310496 Len: 183 Check: 9999 Weight: 1.00  
Name: 90325648 Len: 183 Check: 9999 Weight: 1.00  
Name: 85834299 Len: 183 Check: 9999 Weight: 1.00

Name: 53759093 Len: 183 Check: 9999 Weight: 1.00  
Name: 89081955 Len: 183 Check: 9999 Weight: 1.00  
Name: 59481112 Len: 183 Check: 9999 Weight: 1.00  
Name: 27360737 Len: 183 Check: 9999 Weight: 1.00  
Name: 37681340 Len: 183 Check: 9999 Weight: 1.00  
Name: 37200091 Len: 183 Check: 9999 Weight: 1.00  
Name: 28807946 Len: 183 Check: 9999 Weight: 1.00  
Name: 28899694 Len: 183 Check: 9999 Weight: 1.00  
Name: 77385706 Len: 183 Check: 9999 Weight: 1.00  
Name: 63254034 Len: 183 Check: 9999 Weight: 1.00  
Name: 84376333 Len: 183 Check: 9999 Weight: 1.00  
Name: 91187729 Len: 183 Check: 9999 Weight: 1.00  
Name: 75854221 Len: 183 Check: 9999 Weight: 1.00  
Name: 86164442 Len: 183 Check: 9999 Weight: 1.00  
Name: 32044633 Len: 183 Check: 9999 Weight: 1.00  
Name: 84324040 Len: 183 Check: 9999 Weight: 1.00  
Name: 84317875 Len: 183 Check: 9999 Weight: 1.00  
Name: 94417731 Len: 183 Check: 9999 Weight: 1.00  
Name: 91797860 Len: 183 Check: 9999 Weight: 1.00

//

01790428 -----MLN QLDNLTERVR GSNKLVDRWL HVRKHLLVAY YNLVGIKPGK  
09951566 -----MLE SCRNAQERWG GVHQLIDRWL HERQQLVQAF DALSGIQ---  
91074372 -----MLN QLDNLTERVR GSNKLVDRWL HVRKHLLVAY YNLVGIKPGK  
75236725 -----MLN QLDNLTERVR GSNKLVDRWL HVRKHLLVAY YNLVGIKPGK  
26111197 -----MLN QLDNLTERVR GSNKLVDRWL HVRKHLLVAY YNLVGIKPGK  
24054573 -----MLN QLDNLTERVR GSNKLVDRWL HVRKHLLVAY YNLVGIKPGK  
15834172 -----MLN QLDNLTERVR GSNKLVDRWL HVRKHLLVAY YNLVGIKPGK  
89110043 -----MLN QLDNLTERVR GSNKLVDRWL HVRKHLLVAY YNLVGIKPGK  
85676074 -----MLN QLDNLTERVR GSNKLVDRWL HVRKHLLVAY YNLVGIKPGK  
00396334 -----MLN QLDNLTERVR GSNKLVDRWL HVRKHLLVAY YNLVGIKPGK  
73857966 -----MLN QLDNLTERVR GSNKLVDRWL HVRKHLLVAY YNLVGIKPGK  
30042983 -----MLN QLDNLTERVR GSNKLVDRWL HVRKHLLVAY YNLVGIKPGK  
13364394 -----MLN QLDNLTERVR GSNKLVDRWL HVRKHLLVAY YNLVGIKPGK  
75514762 -----MLN QLDNLTERVR GSNKLVDRWL HVRKHLLVAY YNLVGIKPGK  
75255492 -----MLN QLDNLTERVR GSNKLVDRWL HVRKHLLVAY YNLVGIKPGK  
75238536 -----MLN QLDNLTERVR GSNKLVDRWL HVRKHLLVAY YNLVGIKPGK  
75228134 -----MLN QLDNLTERVR GSNKLVDRWL HVRKHLLVAY YNLVGIKPGK  
75208793 -----MLN QLDNLTERVR GSNKLVDRWL HVRKHLLVAY YNLVGIKPGK  
75197859 -----MLN QLDNLTERVR GSNKLVDRWL HVRKHLLVAY YNLVGIKPGK  
75188725 -----MLN QLDNLTERVR GSNKLVDRWL HVRKHLLVAY YNLVGIKPGK  
75179644 -----MLN QLDNLTERVR GSNKLVDRWL HVRKHLLVAY YNLVGIKPGK  
83584825 -----MLN QLDNLTERVR GSNKLVDRWL HVRKHLLVAY YNLVGIKPGK  
81247748 -----MLN QLDNLTERVR GSNKLVDRWL HVRKHLLVAY YNLVGIKPGK  
12518924 -----MLN QLDNLTERVR GSNKLVDRWL HVRKHLLVAY YNLVGIKPGK  
81242977 -----MLN QLDNLTERVR GSNKLVDRWL HVRKHLLVAY YNLGGIKPGK  
83569013 -----MLN QLDNLTERVR GSNKLVDRWL HVRKHLLVAY YNLVGIKPGK

|          |            |             |             |            |             |
|----------|------------|-------------|-------------|------------|-------------|
| 16422723 | -----MLN   | QLENLTERVG  | GSNKLVDRAWL | DVRKHLLVAY | YNLVGIKPGK  |
| 06960347 | -----MLN   | QLENLTERVG  | GSNKLVDRAWL | DVRKHLLVAY | YNLVGIKPGK  |
| 56130248 | -----MLN   | QLENLTERVG  | GSNKLVDRAWL | DVRKHLLVAY | YNLVGIKPGK  |
| 16762292 | -----MLN   | QLENLMERVG  | GSNKLVDRAWL | DVRKHLLVAY | YNLVGIKPGK  |
| 29139415 | -----MLN   | QLENLMERVG  | GSNKLVDRAWL | DVRKHLLVAY | YNLVGIKPGK  |
| 16504596 | -----MLN   | QLENLMERVG  | GSNKLVDRAWL | DVRKHLLVAY | YNLVGIKPGK  |
| 62130249 | -----MLN   | QLENLTERVG  | GSNKLVDRAWL | DVRKHLLVAY | YNLVGIKPGK  |
| 49609720 | -----MLN   | QLQSLTEYVG  | GNNALIDQWL  | QARKQLLVAY | YHLVGIKPNK  |
| 50119194 | -----MLN   | QLQSLTEYVG  | GNNALIDQWL  | QARKQLLVAY | YHLVGIKPNK  |
| 77957004 | -----MLN   | RLESLTQRVG  | GSNELIDQWL  | HARKELLSY  | CTVIGIKPRK  |
| 77960644 | -----MLN   | RLESLTQRVG  | GSNELIDQWL  | HARKELLSY  | CTVIGIKPRK  |
| 77976252 | -----MLN   | RLESLTQRVG  | GSNELIDQWL  | HARKELLVAY | CAVIGIKPQK  |
| 85058115 | -----MLN   | QLENLAKCVG  | GNNELIDQWL  | QARKGLLVAY | YHLIGLKPNK  |
| 84778635 | -----MLN   | QLENLAKCVG  | GNNELIDQWL  | QARKGLLVAY | YHLIGLKPNK  |
| 77972241 | ---MESMLN  | RLESLTQRVG  | GSNELIDQWL  | HARKELLSY  | CAVIGIKPQK  |
| 51587928 | -----MLN   | RLESLTQRVG  | GSNELIDQWL  | HARKELLSY  | CTVIGIKPQK  |
| 51594646 | -----MLN   | RLESLTQRVG  | GSNELIDQWL  | HARKELLSY  | CTVIGIKPQK  |
| 21957190 | -----MLN   | RLESLTQRVG  | GSNELIDQWL  | HARKELLSY  | CTVIGIKPQK  |
| 15981653 | -----MLN   | RLESLTQRVG  | GSNELIDQWL  | HARKELLSY  | CTVIGIKPQK  |
| 16123874 | -----MLN   | RLESLTQRVG  | GSNELIDQWL  | HARKELLSY  | CTVIGIKPQK  |
| 77631242 | ---MESFMLN | RLESLTQRVG  | GSNELIDQWL  | HARKELLSY  | CTVIGIKPQK  |
| 45437720 | ---MESFMLN | RLESLTQRVG  | GSNELIDQWL  | HARKELLSY  | CTVIGIKPQK  |
| 89103193 | ---MESFMLN | RLESLTQRVG  | GSNELIDQWL  | HARKELLSY  | CTVIGIKPQK  |
| 77633255 | ---MESFMLN | RLESLTQRVG  | GSNELIDQWL  | HARKELLSY  | CTVIGIKPQK  |
| 88816583 | -----MLT   | RLEKAQESWG  | GSHSVIDSWL  | EERQDLLVQY | CKLAGLPPYE  |
| 76876713 | -----MLT   | RVENAQQKWG  | GSHTVIDKWL  | NERQRLIVLY | CKLAGFSPSD  |
| 77361802 | -----MLT   | RVENAQQKWG  | GSHTVIDKWL  | NERQRLIVLY | CKLAGFSPSD  |
| 94426242 | -----MLE   | STKDAQERWG  | GVHDLIDRWL  | SERQNMVLVY | FAIRGLKPFPS |
| 68516055 | -----MLS   | QLEKAEQRWG  | GANKLIDQWL  | ENRRNLLVHY | CQIAGLPPYE  |
| 78361812 | -----MLK   | QLERAEQKWG  | GANTLIDQWL  | NHRRKLLINY | CQIAGLPPYE  |
| 24345897 | -----MLR   | ELEKAEQKWG  | GSNKLIDQWL  | ENRRKLLVHY | CQIAGLPPYT  |
| 68519674 | ---MECIMLR | ELEKAEQKWG  | GSNKLIDQWL  | KNRRKLLVHY | CQIAGLPPYG  |
| 78511884 | ---MECIMLR | ELEKAEQKWG  | GSNKLIDQWL  | ENRRKLLVHY | CQIAGLPPYG  |
| 82405098 | ---MECIMLR | ELEKAEQKWG  | GSNKLIDQWL  | ENRRKLLVHY | CQIAGLPPYG  |
| 78504897 | ---MECIMLR | ELEKAEQKWG  | GSNKLIDQWL  | ENRRKLLVHY | CQIAGLPPYG  |
| 77869348 | -----MLE   | NCRNARERWG  | GVSELIDRWL  | KERQELLVQY | CELSGESDFS  |
| 77811156 | ---MECIMLR | KLEKAERKWG  | GSNKLIDQWL  | ENRRKLLVHY | CQIAGLPPYG  |
| 82718938 | ---MECIMLR | KLEKAERKWG  | GSNKLIDQWL  | ENRRKLLVHY | CQIAGLPPYG  |
| 67087234 | -----MLE   | IRQDAQERWD  | GVHLLIDRWL  | AERRDLLEAF | DSVVRQOT--  |
| 91713833 | -----MLT   | KLEHAEEKKWG | GSHKLIDQWL  | NHRRMLLIQY | FKIAGLAPYT  |
| 56180418 | -----MLS   | RNEQAKKRWG  | GAHKSIDLWL  | SERQDLLVNY | FKLAALPPYE  |
| 89048923 | -----MLS   | KFEQVKKEWG  | GHNDVIDQWL  | MMRQQLLIDY | CKLAGLAPKE  |
| 90437549 | -----MLS   | KFEQVKKEWG  | GHNDVIDQWL  | MMRQQLLIDY | CKLAGLAPKE  |
| 09654744 | -----MVMLR | KFKNVQEQWG  | GSSDIIDHWL  | DKRQHVIVEY | CKLAALQPCT  |
| 75829161 | -----MVMLR | KFKNVQEQWG  | GSSDIIDHWL  | DKRQHVIVEY | CKLAALQPCT  |
| 75828315 | -----MVMLR | KFKNVQEQWG  | GSSDIIDHWL  | DKRQHVIVEY | CKLAALQPCT  |
| 75821890 | -----MVMLR | KFKNVQEQWG  | GSSDIIDHWL  | DKRQHVIVEY | CKLAALQPCT  |
| 75818927 | -----MVMLR | KFKNVQEQWG  | GSSDIIDHWL  | DKRQHVIVEY | CKLAALQPCT  |

|          |             |            |            |            |            |
|----------|-------------|------------|------------|------------|------------|
| 75814786 | -----MVMLR  | KFKNVQEQWG | GSSDIIDHWL | DKRQHVIVEY | CKLAALQPCT |
| 83637095 | -----MLE    | NCQNAKERWG | GVSEIIDRWL | KERQDLIVRY | CDLVGKSKFD |
| 68347580 | -----MLE    | SCQNAQERWG | GVHLLIDRWL | QERHELVRAY | DALGAEPE-- |
| 24981546 | -----MLD    | SCQNAQERWG | GVHKLIDRWL | EERQELVQAF | RALRDVRP-- |
| 82715084 | -----MLD    | SCQNAQERWG | GVHKLIDRWL | EERQELVQAF | RALRDVRP-- |
| 95108439 | -----MLD    | SCQNAQERWG | GVHKLIDRWL | EERQELVQAF | RALRDAKP-- |
| 90332615 | -----MLK    | DLQRLKQHWG | GVSDIVDRWL | EERRELLVKY | CDLIDIHDFD |
| 85694269 | -----MLK    | KSEEARQRWG | GAHDSIDQWL | TERQDLLVNY | FKLAALPPYE |
| 89952826 | -----MLE    | DCKSAQERWG | GVSEIIDRWL | QERQOMLVLY | CNLSEICDLP |
| 69166473 | -----MLT    | KLEKAEKRWG | GSHNLIDQWL | NHRRKLLIQY | FIVAGLAPYS |
| 49080780 | -----MLE    | SCRNAQERWG | GVHQLIDRWL | HERQQLVQAF | DALSGIQ--- |
| 71556785 | -----MLE    | SCQNAQERWG | GVNKLIDRWL | QSRLELVEAY | DALGDTPO-- |
| 28850608 | -----MLE    | SCQNAQERWG | GVNKLIDRWL | QSRLELIEAY | DALGDTPE-- |
| 88772902 | -----MLQ    | QLESVKSRWG | GKSQVVDRL  | MDRQALLVSF | CELAGINKQ- |
| 88776135 | -----MLE    | NCKTAQERWG | GTHEMIDRWL | ADRQOTLILY | FAIQDAE--- |
| 90311708 | -----MLR    | NIEKVKAEWG | GTLNVIDGWL | ANRQQLVVLY | CKLVGTSTEQ |
| 46914939 | -----MLS    | KFEQVQQQWG | GTSDVIDHWL | VSRQQLLIDY | CKLAGLPPFE |
| 54310496 | -----MLS    | KFEQVQQQWG | GTSDVIDHWL | VSRQQLLIDY | CKLAGLPPFE |
| 90325648 | -----MLS    | KFEQVQQQWG | GTSDVIDHWL | VSRQQLLIDY | CKLAGLPPFE |
| 85834299 | -----MLN    | KFKQIQEQWG | GSNEVIDHWL | ETRQSLIVEY | CKLGALQPAS |
| 53759093 | PMLHGGSMILT | ELEQTKRALA | GKHRAIDDWL | DARQALLVEY | MRLAGLKPTR |
| 89081955 | -----MLE    | KCKNAKERWG | GVSEIIDSWL | EERQALISQF | VHLP-EHHIN |
| 59481112 | -----MLT    | RLNQFQAQWG | GNSDVIDHWL | STRQDLLVEY | CKLAGLPPFD |
| 27360737 | -----MVMLK  | KFKQTQEQWG | GSSEVIDHWL | ETRQSLIVEY | CKLAALQPCS |
| 37681340 | -----MVMLK  | KFKQTQEQWG | GSSEVIDHWL | ETRQSLIVEY | CKLAALQPCS |
| 37200091 | -----MVMLK  | KFKQTQEQWG | GSSEVIDHWL | ETRQSLIVEY | CKLAALQPCS |
| 28807946 | -----MVMLK  | KFKQTQDQWG | GSSDVIDHWL | ETRQSLIVEY | CKLAALQPCS |
| 28899694 | -----MVMLK  | KFKQTQDQWG | GSSDVIDHWL | ETRQSLIVEY | CKLAALQPCS |
| 77385706 | HKGREIAMLE  | SCQNAQERWG | GVHLLIDRWL | QEREELIAAY | DRLGAKPO-- |
| 63254034 | LKGREKTMLE  | SCQNAQERWG | GVNKLIDRWL | QSRCLKVEAY | DALGDTPA-- |
| 84376333 | -----MLN    | KFKQIQEQWG | GSNEVIDHWL | ETRQSLIVEY | CKLAALQPSS |
| 91187729 | -----MVMLR  | KFKQTQDQWG | GSSDVIDHWL | ETRQSLIVEY | CKLAALQPCS |
| 75854221 | -----MVMLK  | KFKQTQDQWG | GSSDVIDHWL | ETRQSLIVEY | CKLAALQPCS |
| 86164442 | -----MLE    | SCKSAQERWG | GVHDLIDRWL | NARQALIINF | VQLKER---G |
| 32044633 | -----       | -----      | -MHQLIDRWL | HERQQLVQAF | DALSGIQ--- |
| 84324040 | -----       | -----      | -MHQLIDRWL | HERQQLVQAF | DALSGIQ--- |
| 84317875 | -----       | -----      | -MHQLIDRWL | HERQQLVQAF | DALSGIQ--- |
| 94417731 | -----       | -----      | -MHQLIDRWL | HERQQLVQAF | DALSGIQ--- |
| 91797860 | -----MLE    | DTKTALERWG | GVHTLIDRWL | EQRDMLVTL  | VELQEACD-A |
|          |             |            |            |            |            |
| 01790428 | E-----SYMRL | NEKALDDFCQ | SLVDYLSAGH | FSIYERILHK | LEG---NGQL |
| 09951566 | -A-----PAP  | NAEELQHFCQ | LLLDYVSAGH | FEVYEQLTAE | GKAFGDQRGL |
| 91074372 | E-----SYMRL | NEKALDDFCQ | SLVDYLSAGH | FSIYERILHK | LEG---NGQL |
| 75236725 | E-----SYMRL | NEKALDDFCQ | SLVDYLSAGH | FSIYERILHK | LEG---NGQL |
| 26111197 | E-----SYMRL | NEKALDDFCQ | SLVDYLSAGH | FSIYERILHK | LEG---NGQL |
| 24054573 | E-----SYMRL | NEKALDDFCQ | SLVDYLSAGH | FSIYERILHK | LEG---NGQL |
| 15834172 | E-----SYMRL | NEKALDDFCQ | SLVDYLSAGH | FSIYERILHK | LEG---NGQL |
| 89110043 | E-----SYMRL | NEKALDDFCQ | SLVDYLSAGH | FSIYERILHK | LEG---NGQL |

|          |        |         |            |            |            |            |
|----------|--------|---------|------------|------------|------------|------------|
| 85676074 | E----  | SYMRL   | NEKALDDFCQ | SLVDYLSAGH | FSIYERILHK | LEG---NGQL |
| 00396334 | E----  | SYMRL   | NEKALDDFCQ | SLVDYLSAGH | FSIYERILHK | LEG---NGQL |
| 73857966 | E----  | SYMRL   | NEKALDDFCQ | SLVDYLSAGH | FSIYERILHK | LEG---NGQL |
| 30042983 | E----  | SYMRL   | NEKALDDFCQ | SLVDYLSAGH | FSIYERILHK | LEG---NGQL |
| 13364394 | E----  | SYMRL   | NEKALDDFCQ | SLVDYLSAGH | FSIYERILHK | LEG---NGQL |
| 75514762 | E----  | SYMRL   | NEKALDDFCQ | SLVDYLSAGH | FSIYERILHK | LEG---NGQL |
| 75255492 | E----  | SYMRL   | NEKALDDFCQ | SLVDYLSAGH | FSIYERILHK | LEG---NGQL |
| 75238536 | E----  | SYMRL   | NEKALDDFCQ | SLVDYLSAGH | FSIYERILHK | LEG---NGQL |
| 75228134 | E----  | SYMRL   | NEKALDDFCQ | SLVDYLSAGH | FSIYERILHK | LEG---NGQL |
| 75208793 | E----  | SYMRL   | NEKALDDFCQ | SLVDYLSAGH | FSIYERILHK | LEG---NGQL |
| 75197859 | E----  | SYMRL   | NEKALDDFCQ | SLVDYLSAGH | FSIYERILHK | LEG---NGQL |
| 75188725 | E----  | SYMRL   | NEKALDDFCQ | SLVDYLSAGH | FSIYERILHK | LEG---NGQL |
| 75179644 | E----  | SYMRL   | NEKALDDFCQ | SLVDYLSAGH | FSIYERILHK | LEG---NGQL |
| 83584825 | E----  | SYMRL   | NEKALDDFCQ | SLVDYLSAGH | FSIYERILHK | LEG---NGQL |
| 81247748 | E----  | SYMRL   | NEKALDDFCQ | SLVDYLSAGH | FSIYERILHK | LEG---NGQL |
| 12518924 | E----  | SYMRL   | NEKALDDFCQ | SLVDYLSAGH | FSIYERILHK | LEG---NGQL |
| 81242977 | E----  | SYMRL   | NEKALDDFCQ | SLVDYLSAGH | FSIYERILHK | LES---NGQL |
| 83569013 | E----  | SYMRL   | NEKALDDFCQ | SLVDYLSAGH | FSIYERILHK | LEG---NGQL |
| 16422723 | E----  | SYMRL   | NEKALDDFCQ | SLVDYLSAGH | FSIYERILHK | LEG---NGQL |
| 06960347 | E----  | SYMRL   | NEKALDDFCQ | SLVDYLSAGH | FSIYERILHK | LEG---NGQL |
| 56130248 | E----  | SYMRL   | NEKALDDFCQ | SLVDYLSAGH | FSIYERILHK | LEG---NGQL |
| 16762292 | E----  | SYMRL   | NEKALDDFCQ | SLVDYLSAGH | FSIYERILHK | LEG---NGQL |
| 29139415 | E----  | SYMRL   | NEKALDDFCQ | SLVDYLSAGH | FSIYERILHK | LEG---NGQL |
| 16504596 | E----  | SYMRL   | NEKALDDFCQ | SLVDYLSAGH | FSIYERILHK | LEG---NGQL |
| 62130249 | E----  | SYMRL   | NEKALDNFCQ | SLVDYLSAGH | FSIYERILHK | LEG---NGQL |
| 49609720 | E----  | ALSL    | DEEALDNFCQ | NLVDYLSTGH | FHLYEKMLHE | AATHS-EQVL |
| 50119194 | E----  | ALSL    | DEEALDNFCQ | NLVDYLSTGH | FHLYEKMLHE | AATHS-EQVL |
| 77957004 | E----  | KHTPL   | NEKALENFCH | NLVDYLSAGH | FHIYDRIKQ  | VEGES-SPRM |
| 77960644 | E----  | KHTPL   | NEKALENFCH | NLVDYLSSGH | FHIYDRIKQ  | VEGES-SPRM |
| 77976252 | E----  | KHTPL   | NEKALENFCH | NLVDYLSSGH | FHIYDRIKQ  | VDGAS-SPKM |
| 85058115 | E----  | KHTPL   | DEEALDAFCH | QLVDYLSAGH | FLVYDSIV-- | -----PEGE  |
| 84778635 | E----  | KHTPL   | DEEALDAFCH | QLVDYLSAGH | FLVYDSIV-- | -----PEGE  |
| 77972241 | E----  | KHTPL   | NEKALENFCH | NLVDYLSSGH | FHIYDRIKQ  | VEGAS-SPKM |
| 51587928 | E----  | KHTPL   | NAKTLENFCH | NLVDYLSSGH | FHIYDRIKE  | VEGAS-SPKM |
| 51594646 | E----  | KHTPL   | NAKTLENFCH | NLVDYLSSGH | FHIYDRIKE  | VEGAS-SPKM |
| 21957190 | E----  | KHTPL   | NAKTLENFCH | NLVDYLSSGH | FHLYDRIKE  | VEGAS-SPKM |
| 15981653 | E----  | KHTPL   | NAKTLENFCH | NLVDYLSSGH | FHLYDRIKE  | VEGAS-SPKM |
| 16123874 | E----  | KHTPL   | NAKTLENFCH | NLVDYLSSGH | FHLYDRIKE  | VEGAS-SPKM |
| 77631242 | E----  | KHTPL   | NAKTLENFCH | NLVDYLSSGH | FHIYDRIKE  | VEGAS-SPKM |
| 45437720 | E----  | KHTPL   | NAKTLENFCH | NLVDYLSSGH | FHLYDRIKE  | VEGAS-SPKM |
| 89103193 | E----  | KHTPL   | NAKTLENFCH | NLVDYLSSGH | FHLYDRIKE  | VEGAS-SPKM |
| 77633255 | E----  | KHTPL   | NAKTLENFCH | NLVDYLSSGH | FHLYDRIKE  | VEGAS-SPKM |
| 88816583 | ---    | RNDQALP | AKAAIISFCE | ILVDYLSAGH | FEIYDDIVKA | CQEKG-POSL |
| 76876713 | ---    | KKDHALP | EPQQIETFCQ | ILMDYLSAGH | FEIYDDIAKA | CESKG-PESQ |
| 77361802 | ---    | KKDHALP | EPQQIETFCQ | ILMDYLSAGH | FEIYDDIAKA | CESKG-PESQ |
| 94426242 | PR---- | ETP     | LSVKVEAFCQ | VLMDYLSAGH | FEIYEKLLLE | AQEYD-DGGI |
| 68516055 | ---    | DRAR-LP | SFDHVKAFCQ | LLVDYVSEGH | FEIYNKVSA  | CETNG-KSSQ |
| 78361812 | ---    | AIDKSLP | AFKSVKEFCQ | LLVDYVSEGH | FEVYDRVTA  | CEKNG-ESSQ |

|          |            |            |            |            |            |            |
|----------|------------|------------|------------|------------|------------|------------|
| 24345897 | ---        | NAEKSLP    | SFEHVKSFC  | LLVDYVSEGH | FEVYDQVINA | CEKFG-APCK |
| 68519674 | ---        | KSEKSLP    | SFEHVKSFC  | LLVDYVSEGH | FEVYDRVVNA | CSEYG-ESSK |
| 78511884 | ---        | KAEKSLP    | SFDHVKSFC  | LLVDYVSEGH | FEVYDQVVNA | CEKFG-ATSK |
| 82405098 | ---        | KAEKSLP    | SFDHVKSFC  | LLVDYVSEGH | FEVYDQVVNA | CEKFG-ATSK |
| 78504897 | ---        | KAEKSLP    | SFDHVKSFC  | LLVDYVSEGH | FEVYDQVVNA | CEKFG-ASSK |
| 77869348 | -Q-----    | TDA        | LREKFVRLCE | VLVDYVSAGH | FEVYEQLIQE | AREFN-DGGL |
| 77811156 | ---        | KSEKSLP    | SLEHVKSFC  | LLVDYVSEGH | FEVYDQVVTA | CEKFG-ASSK |
| 82718938 | ---        | KSEKSLP    | SLEHVKSFC  | LLVDYVSEGH | FEVYDQVVTA | CEKFG-ASSK |
| 67087234 | -I-----    | PAA        | SAEALQVFC  | LLVDYVSAGH | FEVYEQLMGE | AESFGDRRGL |
| 91713833 | ---        | RPDKKLP    | PFQTVKNFCA | QLVDYVSEGH | FEVYDQVVTA | CEEFG-ESSR |
| 56180418 | ---        | SIRGLP     | DVTDIRNFCG | QLVDYVSSGH | FEIYDQIVRE | ASSQG-NSVD |
| 89048923 | --         | EANR-QLP   | TASQLSLFSE | ALVDYISAGH | FKIYDNVMER | WHQTG-YSPT |
| 90437549 | --         | EANR-QLP   | TASQLSLFSE | ALVDYISAGH | FKIYDNVMER | WHQTG-YSPT |
| 09654744 | TKAAVS-ELP | SPQALLYFCQ | ELVDYISEGH | FKIYDMVMDK | WHATG-FKAT |            |
| 75829161 | TKAAVS-ELP | SPQALLYFCQ | ELVDYISEGH | FKIYDMVMDK | WHATG-FKAT |            |
| 75828315 | TKAAVS-ELP | SPQALLYFCQ | ELVDYISEGH | FKIYDMVMDK | WHATG-FKAT |            |
| 75821890 | TKAAVS-ELP | SPQALLYFCQ | ELVDYISEGH | FKIYDMVMDK | WHATG-FKAT |            |
| 75818927 | TKAAVS-ELP | SPQALLYFCQ | ELVDYISEGH | FKIYDMVMDK | WHATG-FKAT |            |
| 75814786 | TKAAVS-ELP | SPQALLYFCQ | ELVDYISEGH | FKIYDMVMDK | WHATG-FKAT |            |
| 83637095 | -D-----    | VES        | AVKNFKTFCQ | VLLDYVSAGH | FEVYEQLIEE | AREFN-DGGM |
| 68347580 | -A-----    | LSE        | SKKPLQEF   | ILVDYVSAGH | FEIYEQLTSE | AKAFGDKRGL |
| 24981546 | -A-----    | FA-        | DKDTNGDFCA | LLVDYVSAWH | FEVCEQLVSE | AKAFGDKKAL |
| 82715084 | -A-----    | FA-        | DKDTNGDFCA | LLVDYVSAWH | FEVCEQLVSE | AKAFGDKKAL |
| 95108439 | -A-----    | FA-        | DKDKNRDFCA | LLVDYVSAWH | FEVSEQLVSE | AKAFGDTKAL |
| 90332615 | SA-----    | NRA        | HGDKLKSFC  | VMVDYVSVGH | FEVYEQLAKE | AEAFSDSEGL |
| 85694269 | ---        | GVRNGLP    | DVTDIRDFCG | QLVDYVSSGH | FEIYEQLMKQ | ARENK-QPLE |
| 89952826 | -D-----    | HPE        | RAAQVKTLC  | IVVDYVSAGH | FEIYNQLLQ  | GEEFEDQOGL |
| 69166473 | ---        | RSEKSLP    | SMDQVKQFCA | QLVDYVSEGH | FEVYDNVKA  | CEKFG-ETSI |
| 49080780 | -A-----    | PAP        | NAEELQHFCQ | LLLDYVSAGH | FGVYEQLTAE | GKAFGDQRGL |
| 71556785 | -A-----    | LAA        | DREGLQNF   | VLVDYVSAGH | FEVYEQLGDE | ARAFNDERGL |
| 28850608 | -A-----    | LAA        | DREGLQNF   | ILVDYVSAGH | FEVYEQLGDE | ARAFNDERGL |
| 88772902 | -----      | SESLP      | DADEIANFCS | ALLDYLSAGH | FEVFDILVED | -----DDEGL |
| 88776135 | GR-----    | E-A        | VSTQLQAF   | HLVDYVSEGH | FEIYEQLFRE | AKEY-DDGGM |
| 90311708 | ---        | QKKQELP    | SQKEITNFCQ | TLLDYTSTGH | FGIYEQIILQ | CKLDG-EQNL |
| 46914939 | --         | SNTR-QLP   | TSSQLQLFCQ | QVVDYISAGH | FKIYDMVMEK | WNTAG-YSPT |
| 54310496 | --         | SNTR-QLP   | TSSQLQLFCQ | QVVDYISAGH | FKIYDMVMEK | WNTAG-YSPT |
| 90325648 | --         | SNTR-QLP   | TSSQLQLFCQ | QVVDYISAGH | FKIYDMVMEK | WNTAG-YSPT |
| 85834299 | NGQSNVVELP | SPKEISSFC  | HVVDYISEGH | FKIYDMVMKK | WQATG-FKTN |            |
| 53759093 | NSK--      | QRSLP      | GHVELQSF   | QLVDYVSAGH | FEIYHHVVTA | FEQAS-GDKL |
| 89081955 | -----      | DE         | LNTKVQSF   | VLMDYLSSGH | FEVYEQLLRE | GSDFD-DGSL |
| 59481112 | --         | SSVS-TLP   | DFASIQSFTQ | HLIDYISEGH | FKIYNMVMK  | WDATG-FSPT |
| 27360737 | TKSNVL-ELP | SPHELOQFCQ | HLVDYISEGH | FKIYDMVMDK | WRATG-FEAT |            |
| 37681340 | TKSNVL-ELP | SPHELOQFCQ | HLVDYISEGH | FKIYDMVMDK | WRATG-FEAT |            |
| 37200091 | TKSNVL-ELP | SPHELOQFCQ | HLVDYISEGH | FKIYDMVMDK | WRATG-FEAT |            |
| 28807946 | -KSNVL-ELP | SPSELQNF   | HLVDYISEGH | FKIYDMVMDK | WKATG-FVAT |            |
| 28899694 | -KSNVL-ELP | SPSELQNF   | HLVDYISEGH | FKIYDMVMDK | WKATG-FVAT |            |
| 77385706 | -A-----    | LSE        | DRKPLQEF   | VLVDYVSAGH | FEIYEQLTGE | AKAFNDKRGL |
| 63254034 | -A-----    | LAA        | DREGLQNF   | ILVDYVSAGH | FEVYEQLGDE | ARAFNDKRGL |

84376333 SKATAITELP SPEELQKFSQ HLVDYISEGH FKIYDMVMDK WQSTG-FKAT  
91187729 -KTNVI-ELP SPSELQDFCQ HLVDYISEGH FKIYDMVMDR WKATG-FVVT  
75854221 -KTNVI-ELP SPSELQDFCQ HLVDYISEGH FKIYDMVMDR WKATG-FVVT  
86164442 EF-----TPL DTNNIQKVCE QLIDYVSTGH FEIYEQLAKE AEAFNDGAL  
32044633 -A-----PAP NAEELQHFCQ LLLDYVSAGH FEVYEQLTAE GKAFGDQRGL  
84324040 -A-----PAP NAEELQHFCQ LLLDYVSAGH FEVYEQLTAE GKAFGDQRGL  
84317875 -A-----PAP NAEELQHFCQ LLLDYVSAGH FEVYEQLTAE GKAFGDQRGL  
94417731 -A-----PAP NAEELQHFCQ LLLDYVSAGH FEVYEQLTAE GKAFGDQRGL  
91797860 EL-----ETV TKERIDAFSE TLMDYISGGH FEIYPQLRDE AVAFDDQREAL

01790428 ARAAKIWPQL EANTQOIMDY YDSSLETAID HD-NYLEFQQ VLSDIGEAL  
09951566 ELAKQIFPRL EAITESALNF NDRCDNGDCR ---EGACLIA ELKVLRRQLH  
91074372 ARAAKIWPQL EANTQOIMDD YDSSLETAID HD-NYLEFQQ VLSDIGEAL  
75236725 ARAAKIWPQL EANTQOIMDD YDSSLETAID HD-NYLEFQQ VLSDIGEAL  
26111197 ARAAKIWPQL EANTQOIMDD YDSSLETAID HD-NYLEFQQ VLSDIGEAL  
24054573 ARAAKIWPQL EANTQOIMDY YDSSLETAID HD-NYLEFQQ VLSDIGEAL  
15834172 ARAAKIWPQL EANTQOIMDY YDSSLETAID HD-NYLEFQQ VLSDIGEAL  
89110043 ARAAKIWPQL EANTQOIMDY YDSSLETAID HD-NYLEFQQ VLSDIGEAL  
85676074 ARAAKIWPQL EANTQOIMDY YDSSLETAID HD-NYLEFQQ VLSDIGEAL  
00396334 ARAAKIWPQL EANTQOIMDY YDSSLETAID HD-NYLEFQQ VLSDIGEAL  
73857966 ARAAKIWPQL EANTQOIMDY YDSSLETAID HD-NYLEFQQ VLSDIGEAL  
30042983 ARAAKIWPQL EANTQOIMDY YDSSLETAID HD-NYLEFQQ VLSDIGEAL  
13364394 ARAAKIWPQL EANTQOIMDY YDSSLETAID HD-NYLEFQQ VLSDIGEAL  
75514762 ARAAKIWPQL EANTQOIMDY YDSSLETAID HD-NYLEFQQ VLSDIGEAL  
75255492 ARAAKIWPQL EANTQOIMDY YDSSLETAID HD-NYLEFQQ VLSDIGEAL  
75238536 ARAAKIWPQL EANTQOIMDY YDSSLETAID HD-NYLEFQQ VLSDIGEAL  
75228134 ARAAKIWPQL EANTQOIMDY YDSSLETAID HD-NYLEFQQ VLSDIGEAL  
75208793 ARAAKIWPQL EANTQOIMDY YDSSLETAID HD-NYLEFQQ VLSDIGEAL  
75197859 ARAAKIWPQL EANTQOIMDY YDSSLETAID HD-NYLEFQQ VLSDIGEAL  
75188725 ARAAKIWPQL EANTQOIMDY YDSSLETAID HD-NYLEFQQ VLSDIGEAL  
75179644 ARAAKIWPQL EANTQOIMDY YDSSLETAID HD-NYLEFQQ VLSDIGEAL  
83584825 ARAAKIWPQL EANTQOIMDY YDSSLETAID HD-NYLEFQQ VLSDIGEAL  
81247748 ARAAKIWPQL EANTQOIMDY YDSSLETAID HD-NYLEFQK VLSDIGEAL  
12518924 ARAAKIWPQL EANTQOIMDY YDSSLETAID HD-NYLEFQQ VLSDIGEAL  
81242977 ARAAKIWPQL EANTQOIMDY YDSSLETAID HD-NYLEFQQ VLSDIGEAL  
83569013 ARAAKIWPQL EANTQOIMDY YDSSLETAID HD-NYLEFQQ VLSDIGEAL  
16422723 LHAAKIWPLL EDNTQRIMDY YDTSLETAID HD-NCLEFQQ ALSDIGEAL  
06960347 LHAAKIWPLL EDNTQRIMDY YDTSLETAID HD-NCLEFQQ ALSDIGEAL  
56130248 LHAAKIWPLL EDNTQRIMDY YDTSLETAID HD-NRLEFQQ ALSDIGEAL  
16762292 LHAAKIWPLL EDNTQRIMDY YDTSLETAID HD-NCLEFQQ ALSDIGEAL  
29139415 LHAAKIWPLL EDNTQRIMDY YDTSLETAID HD-NCLEFQQ ALSDIGEAL  
16504596 LHAAKIWPLL EDNTQRIMDY YDTSLETAID HD-NCLEFQQ ALSDIGEAL  
62130249 LHAAKIWPLL EDNTQRIMDY YDTSLETAID HD-NCLEFQQ ALSDIGEAL  
49609720 ALSTQLDFAL QNNTQOIMTF YDSHLAAID HD-NCIEFQQ ALSSVGEAL  
50119194 ALSTQLDFAL QNNTQOIMTF YDSHLAAID HD-NCIEFQQ ALSSVGEAL  
77957004 ALTTKVYPAL KNNTQTIMLF HDRYTNIEID DDDSCTEFQQ ALSDIGEALD  
77960644 ALTTKVYPAL KNNTQTIMSF HDRYTNIEID DD-SCAEFQQ ALSDIGEALD  
77976252 ALTTKVYPAL KNNTQTIMAF HDRYTNIEID QD-SCIEFQQ ALSDIGEALD

|          |            |            |            |            |            |
|----------|------------|------------|------------|------------|------------|
| 85058115 | SSSTLTYSGL | QENTQOIMAL | YDSHLENAID | HD-NYLSFQE | ALSGVGEALA |
| 84778635 | SSSTLTYSGL | QENTQOIMAL | YDSHLENAID | HD-NYLSFQE | ALSGVGEALA |
| 77972241 | ALTTKVYPAL | KNNTQTIMAF | HDRYTNIEID | QD-SCTEFQQ | ALSDIGEALD |
| 51587928 | ALTAKIHPAL | KNNTQTIMAF | HDRYTNIEID | DD-SCTEYQQ | ALSDIGEALD |
| 51594646 | ALTAKIHPAL | KNNTQTIMAF | HDRYTNIEID | DD-SCTEYQQ | ALSDIGEALD |
| 21957190 | ALTAKIHPAL | KNNTQTIMAF | HDCYTNIEID | DD-SCTEYQQ | ALSDIGEALD |
| 15981653 | ALTAKIHPAL | KNNTQTIMAF | HDCYTNIEID | DD-SCTEYQQ | ALSDIGEALD |
| 16123874 | ALTAKIHPAL | KNNTQTIMAF | HDCYTNIEID | DD-SCTEYQQ | ALSDIGEALD |
| 77631242 | ALTAKIHPAL | KNNTQTIMAF | HDRYTNIEID | DD-SCTEYQQ | ALSDIGEALD |
| 45437720 | ALTAKIHPAL | KNNTQTIMAF | HDCYTNIEID | DD-SCTEYQQ | ALSDIGEALD |
| 89103193 | ALTAKIHPAL | KNNTQTIMAF | HDCYTNIEID | DD-SCTEYQQ | ALSDIGEALD |
| 77633255 | ALTAKIHPAL | KNNTQTIMAF | HDCYTNIEID | DD-SCTEYQQ | ALSDIGEALD |
| 88816583 | ALAKELYPKI | ASSTDMALNF | NDQYAESADD | NL--LETFDK | DLSELGEILE |
| 76876713 | LLANAIYPKI | TDTTDIALDF | NDKYAEVDKE | DL--LVGFDN | DLSVLGEALE |
| 77361802 | LLANAIYPKI | TDTTDIALDF | NDKYAEVDKE | DL--LVGFDN | DLSVLGEALE |
| 94426242 | DLARKHYPRL | EQITERCVFV | NDKYDNAEHC | -LEQLSDLPK | DLSEIGELLE |
| 68516055 | DIAKNLLPKI | HNTTDMALDF | NDKYTGVDDE | NV--LMQLDE | DLSHLGDAME |
| 78361812 | ALAQTIVPKI | SETTDMALDF | NDKYTSASDD | KI--LYQLDK | DLSSLGDAME |
| 24345897 | AAIQQVLPKI | TPTTNAALDF | NDKYAETQDD | QV--LYQLDK | DLSELAHTME |
| 68519674 | TLAQQVLPKI | TPTTNAALDF | NDKYAETQDD | LV--LYQLDK | DLSELAHNME |
| 78511884 | TLAQQVLPKI | TPTTNAALDF | NDKYAEAQDD | QV--LYQLDK | DLSELAHTME |
| 82405098 | TLAQQVLPKI | TPTTNAALDF | NDKYAEAQDD | QV--LYQLDK | DLSELAHTME |
| 78504897 | TLAQQVLPKI | TPTTNAALDF | NDKYAEAQDD | QV--LYQLDK | DLSELAHTME |
| 77869348 | ELAAKLYPRI | EQTTEVALNF | NDRLDGRELS | EV-DVKELFN | ELSRGGEVLE |
| 77811156 | TLAQQVLPKI | TPTTSAALDF | NDKYAEAQDD | HV--LYQLDK | DLSDLAHTME |
| 82718938 | TLAQQVLPKI | TPTTSAALDF | NDKYAEAQDD | HV--LYQLDK | DLSDLAHTME |
| 67087234 | GLARQIYPRL | EAITQAALAF | NDRLDNGDCL | ----DGSLSR | EIEALGGLLR |
| 91713833 | AVAQALLPKI | SDTTDMALDF | NDKYTEADDE | QV--LYQLDK | DLSKLAQSME |
| 56180418 | DLADELFPLI | SDTTEIALDF | NDKYGEISST | DH--CETFDN | DLSALGEALE |
| 89048923 | EEISTLYAKI | TSTTDPLLNF | NDKYSEVKKD | DL--LEQFDE | DLSQVGELME |
| 90437549 | EEISTLYAKI | TLTTDPLLNF | NDKYSEVKQD | DL--LESFDE | DLSQVGELME |
| 09654744 | DEINQVYGKI | VATTEPLLNF | NDQYATVTEY | DE--LLDLDR | DLSKVGEVLE |
| 75829161 | DEINQVYGKI | VATTEPLLNF | NDQYATVTEY | DE--LLDLDR | DLSKVGEVLE |
| 75828315 | DEINQVYGKI | VATTEPLLNF | NDQYATVTEY | DE--LLDLDR | DLSKVGEVLE |
| 75821890 | DEINQVYGKI | VATTEPLLNF | NDQYATVTEY | DE--LLDLDR | DLSKVGEVLE |
| 75818927 | DEINQVYGKI | VATTEPLLNF | NDQYATVTEY | DE--LLDLDR | DLSKVGEVLE |
| 75814786 | DEINQVYGKI | VATTEPLLNF | NDQYATVTEY | DE--LLDLDR | DLSKVGEVLE |
| 83637095 | ELVKELYPKI | QSTTEAALDY | NDRFDKTPEE | -LSELNALLP | ELSRGGERLE |
| 68347580 | ELADTLYPRI | DVITEKLLAF | NDLCDAGQC- | -----VAQ   | KFKELGGLLH |
| 24981546 | KLAEEinPRI | NDSTQIALAF | NDHCTKGECK | D---TERFAE | KLAKLGGLLH |
| 82715084 | KLAEEinPRI | NDSTQIALAF | NDHCTKGECK | D---TERFAE | KLAKLGGLLH |
| 95108439 | ELATQINPRI | DDSTQIALAF | NDHCEKGECK | D---PERFAD | KLKLGGLLR  |
| 90332615 | KTGADLVEKI | QPSTEAVLDF | NDKYLETDDL | -----DTLAA | DLSFIGEVLE |
| 85694269 | ALLEQVFPLI | SDTTEIALDF | NDNYGEIDSN | --NHLNQFDR | DLSALGEAIE |
| 89952826 | KQAGELFKII | DSSTEVALDF | NDKYLETDD- | ----LETINQ | DLSHLGESLV |
| 69166473 | ETANALLPLI | SESTDAALDF | NDKYTDASDE | --QVLYQLDN | DLSHLAQAME |
| 49080780 | ELAKQIFPRL | EAITESALNF | NDRCDNGDCR | E---GACLIA | ELKVLRQQLH |
| 71556785 | ELADTIYPRL | DVITKFALTF | NDRCDKGDCS | D---ATVVAK | EFNQLGQLLH |

|          |            |            |             |            |            |
|----------|------------|------------|-------------|------------|------------|
| 28850608 | ELADTIYPRL | DVITKFALTF | NDRCDKGDCS  | D---AAVVAK | EFNQLGQLLH |
| 88772902 | DLKDKLYPKL | TKTTDAALAF | NDTFAQAVTP  | E--QAAGFDA | ALAQLGETLE |
| 88776135 | DLAKQLYPRL | EELTQVMLDF | NDKYISSDHV  | -VMNIDDLHE | DLSSLGKMT  |
| 90311708 | KIAQELYSRI | TTTTDTALNF | NDKYAENATE  | --IALLDFFD | DLSELGQKME |
| 46914939 | EDISLLYASI | TQTDPILNF  | TDRYS DIAEE | --NTLTDLDK | DLSSIGELLE |
| 54310496 | EDISLLYASI | TQTDPILNF  | TDRYS DIAEE | --NTLTDLDK | DLSSIGELLE |
| 90325648 | EDISLLYASI | TQTDPILNF  | TDRYS DIAEE | --NTLIDLK  | DLSSIGELLE |
| 85834299 | DEIDTTYAKI | VLTTPELLEF | NDKYVKVSAD  | DE--LPNFEG | DMSKVGELLE |
| 53759093 | ELAKRIYPHI | RACTEFALEF | NDKYSNADEA  | ---QMLLLDE | DLNQLGPVLE |
| 89081955 | EEGQSILPKI | QISTDVALDF | NDDFSNLLDP  | TVQQIREFSE | RLSKLGEALE |
| 59481112 | EEMSQLYAHI | TKTTDPILNF | TDKYSKDDEE  | LL--LSDFDN | DFSTLGEIIE |
| 27360737 | TEINETYAKI | VLTTPELLSF | TDMYASVGED  | DP--LESFEP | DLSKVGEIIE |
| 37681340 | TEINETYAKI | VLTTPELLSF | TDMYASVGED  | DP--LESFEP | DLSKVGEIIE |
| 37200091 | TEINETYAKI | VLTTPELLSF | TDMYASVGED  | DP--LESFEP | DLSKVGEIIE |
| 28807946 | NEINQTYGKI | VLTTPELLNF | TDKYS DVTED | DE--LEDFDS | DMSLIGEIIE |
| 28899694 | NEINQTYGKI | VLTTPELLNF | TDKYS DVTED | DE--LEDFDS | DMSLIGEIIE |
| 77385706 | ELAETIYPRI | DVITEKLLAF | NDLCDEGKC-  | -----VAE   | KFKELGGLLH |
| 63254034 | ELADTIYPRL | DFITKFALTF | NDRCDKGDCS  | D---ATAVAR | EFNQLGQLLH |
| 84376333 | DEINQSYGHI | VLTTDPLLNF | TDKYAAIEAS  | DT--LESFDS | ELSLVGEILE |
| 91187729 | NEINQTYGQI | VLTTPELLNF | NDKYSEVTE   | DE--LNDFDS | DMCLIGEILE |
| 75854221 | NEINQTYGQI | VLTTPELLNF | NDKYSEVTE   | DE--LDDFDS | DMCLIGEILE |
| 86164442 | LLLKNLLPEI | QKNTEVIEEF | NDKFDTKDHC  | -NDQLGSLPF | SLQALGLVLA |
| 32044633 | ELAKQIFPRL | EAITESALNF | NDRCDNGDCR  | ---EGACLIA | ELKVLRQQLH |
| 84324040 | ELAKQIFPRL | EAITESALNF | NDRCDNGDCR  | ---EGACLIA | ELKVLRQQLH |
| 84317875 | ELAKQIFPRL | EAITESALNF | NDRCDNGDCR  | ---EGACLIA | ELKVLRQQLH |
| 94417731 | ELAKQIFPRL | EAITESALNF | NDRCDNGDCR  | ---EGACLIA | ELKSLRQQLH |
| 91797860 | ALADHLLARL | EMSTQMVLEF | DNDYSTPVRC  | -QHYAARLPA | WLERLTKGLT |

|          |            |            |            |      |
|----------|------------|------------|------------|------|
| 01790428 | ARFVLEDKLI | LLVLDA---- | ARVKHPA--- | ---- |
| 09951566 | ERFELEDCLI | EVLHNAHSQS | GAEGSAVPV- | ---- |
| 91074372 | ARFVLEDKLI | LLVLDA---- | ARVKYPA--- | ---- |
| 75236725 | ARFVLEDKLI | LLVLDA---- | ARVKYPA--- | ---- |
| 26111197 | ARFVLEDKLI | LLVLDA---- | ARVKHPA--- | ---- |
| 24054573 | ARFVLEDKLI | LLVLDA---- | ARVKHPA--- | ---- |
| 15834172 | ARFVLEDKLI | LLVLDA---- | ARVKHPA--- | ---- |
| 89110043 | ARFVLEDKLI | LLVLDA---- | ARVKHPA--- | ---- |
| 85676074 | ARFVLEDKLI | LLVLDA---- | ARVKHPA--- | ---- |
| 00396334 | ARFVLEDKLI | LLVLDA---- | ARVKHPA--- | ---- |
| 73857966 | ARFVLEDKLI | LLVLDA---- | ARVKHPA--- | ---- |
| 30042983 | ARFVLEDKLI | LLVLDA---- | ARVKHPA--- | ---- |
| 13364394 | ARFVLEDKLI | LLVLDA---- | ARVKHPA--- | ---- |
| 75514762 | ARFVLEDKLI | LLVLDA---- | ARVKHPA--- | ---- |
| 75255492 | ARFVLEDKLI | LLVLDA---- | ARVKHPA--- | ---- |
| 75238536 | ARFVLEDKLI | LLVLDA---- | ARVKHPA--- | ---- |
| 75228134 | ARFVLEDKLI | LLVLDA---- | ARVKHPA--- | ---- |
| 75208793 | ARFVLEDKLI | LLVLDA---- | ARVKHPA--- | ---- |
| 75197859 | ARFVLEDKLI | LLVLDA---- | ARVKHPA--- | ---- |
| 75188725 | ARFVLEDKLI | LLVLDA---- | ARVKHPA--- | ---- |

|          |            |             |            |      |
|----------|------------|-------------|------------|------|
| 75179644 | ARFVLEDKLI | LLVLDA----  | ARVKHPA--- | ---- |
| 83584825 | ARFVLEDKLI | LLVLDA----  | ARVKHPA--- | ---- |
| 81247748 | ARFVLEDKLI | LLVLDA----  | ARVKHPA--- | ---- |
| 12518924 | ARFVLEDKLI | LLVLDA----  | ARVKHPA--- | ---- |
| 81242977 | ARFVLEDKLI | LLVLDA----  | ARVKHPA--- | ---- |
| 83569013 | ARFVLEDKLI | LLVLEF----  | CAVNA----- | ---- |
| 16422723 | ARFVLEDKLI | MLVFDAMHDG  | ARVKRPA--- | ---- |
| 06960347 | ARFVLEDKLI | MLVFDAMHDG  | ARVKRPA--- | ---- |
| 56130248 | ARFVLEDKLI | MLVFDAMHDG  | ARVKRPA--- | ---- |
| 16762292 | ARFVLEDKLI | MLVFDAMHDG  | ARVKRPA--- | ---- |
| 29139415 | ARFVLEDKLI | MLVFDAMHDG  | ARVKRPA--- | ---- |
| 16504596 | ARFVLEDKLI | MLVFDAMHDG  | ARVKRPA--- | ---- |
| 62130249 | ARFVLEDKLI | MLVFDAMHDG  | ARVKRPA--- | ---- |
| 49609720 | ERFTLEDNMI | KQVYDN----  | -----      | ---- |
| 50119194 | ERFTLEDNMI | KQVYDN----  | -----      | ---- |
| 77957004 | ARFQLEDQLI | KWAAESWQTA  | QPE--NRKSQ | AN-  |
| 77960644 | ARFQLEDQLI | KWAAESWQAA  | QPE--NKKSQ | AN-  |
| 77976252 | ARFRLEDQLI | QWAAESWQAA  | QPE--NKKSQ | AN-  |
| 85058115 | TRFVLEDKLI | QQAME-----  | -----      | ---- |
| 84778635 | TRFVLEDKLI | QQAME-----  | -----      | ---- |
| 77972241 | ARFRLEDQLI | QWAAESWQAA  | QSI--DLQTK | AN-  |
| 51587928 | ARFKLEDQLI | QWAAESWQAA  | QLADADKKSQ | VN-  |
| 51594646 | ARFKLEDQLI | QWAAESWQAA  | QLADADKKSQ | VN-  |
| 21957190 | ARFRLEDQLI | QWAAESWQAA  | QLADADKKSQ | VN-  |
| 15981653 | ARFRLEDQLI | QWAAESWQAA  | QLADADKKSQ | VN-  |
| 16123874 | ARFRLEDQLI | QWAAESWQAA  | QLADADKKSQ | VN-  |
| 77631242 | ARFKLEDQLI | QWAAESWQAA  | QLADADKKSQ | VN-  |
| 45437720 | ARFRLEDQLI | QWAAESWQAA  | QLADADKKSQ | VN-  |
| 89103193 | ARFRLEDQLI | QWAAESWQAA  | QLADADKKSQ | VN-  |
| 77633255 | ARFRLEDQLI | QWAAESWQAA  | QLADADKKSQ | VN-  |
| 88816583 | QRFYEDEL   | DNLYSNHLDK  | -----      | ---- |
| 76876713 | ARFALEDELI | DNLFANHTD-  | -----      | ---- |
| 77361802 | ARFALEDELI | DNLFANHTD-  | -----      | ---- |
| 94426242 | ERFELEDELI | ENLHNVHKQT  | PA-----    | ---- |
| 68516055 | TRFQLEDQLL | EVLHSHKHS-- | -----      | ---- |
| 78361812 | TRFQLEDQLL | EVLHSHKYS-  | -----      | ---- |
| 24345897 | TRFELEDKLL | EVLHSHKYS-  | AQQA-----  | ---- |
| 68519674 | TRFELEDELL | EVLHRKHSEH  | TQ-----    | ---- |
| 78511884 | TRFELEDKLL | EVLHNQYSEH  | AQQA-----  | ---- |
| 82405098 | TRFELEDKLL | EVLHNQYSEH  | AQQA-----  | ---- |
| 78504897 | TRFELEDKLL | EVLHNQYSEH  | AQQA-----  | ---- |
| 77869348 | SRFEMEDFLI | ENLHNAHAGK  | VASA-----  | ---- |
| 77811156 | TRFELEDELL | EVLYNKHSEQ  | TQQV-----  | ---- |
| 82718938 | TRFELEDELL | EVLYNKHSEQ  | TQQV-----  | ---- |
| 67087234 | ERFELEDCLI | EVLNNAHWQI  | AASA-----  | ---- |
| 91713833 | TRFELEDELL | EILHSRHS--  | -----      | ---- |
| 56180418 | LRMEFEDKLL | NHLDEHNLIT  | A-----     | ---- |
| 89048923 | LRFALEDKLI | ELISDSLSCP  | PGA-----   | ---- |

|          |            |            |            |      |
|----------|------------|------------|------------|------|
| 90437549 | LRFALEDKLI | ELISDSLSCP | PGA-----   | ---- |
| 09654744 | LRFSLEDQLI | QLIADSLAVP | PGA-----   | ---- |
| 75829161 | LRFSLEDQLI | QLIADSLAVP | PGA-----   | ---- |
| 75828315 | LRFSLEDQLI | QLIADSLAVP | PGA-----   | ---- |
| 75821890 | LRFSLEDQLI | QLIADSLAVP | PGA-----   | ---- |
| 75818927 | LRFSLEDQLI | QLIADSLAVP | PGA-----   | ---- |
| 75814786 | LRFSLEDQLI | QLIADSLAVP | PGA-----   | ---- |
| 83637095 | ERFELEDMLI | EKLHNAHADQ | VA-----    | ---- |
| 68347580 | ERFELEDCLI | EVLHNAHKQE | AVAQA----- | ---- |
| 24981546 | ERFELEDCLI | EVLHNAHKEE | GAVQA----- | ---- |
| 82715084 | ERFELEDCLI | EVLHNAHKEE | GAVQA----- | ---- |
| 95108439 | ERFELEDCLI | EVLHTAHKEE | DALQA----- | ---- |
| 90332615 | QRFESDKMI  | EVLHNDHLEQ | LQKAS----- | ---- |
| 85694269 | LRMEFEDQLL | HHLEKHEAL- | -----      | ---- |
| 89952826 | SRFEAEDKMI | EVLHVSHKDQ | VA-----    | ---- |
| 69166473 | SRFELEDQLL | ELLYQRLP-- | -----      | ---- |
| 49080780 | ERFELEDCLI | EVLHNAHSQS | GAEGSAVPVG | ---  |
| 71556785 | ERFELEDCLI | EVLHNSHKEE | IAAQV----- | ---- |
| 28850608 | ERFELEDCLI | EVLHTSHKEE | VAAQV----- | ---- |
| 88772902 | ERFALEDELI | AHVHTNKRDP | EVTL-----  | ---- |
| 88776135 | ERFDMEDQLI | ERLHNHQQQA | AESR-----  | ---- |
| 90311708 | ERFEREDQLL | EVLMLHNTLV | -----      | ---- |
| 46914939 | LRFGLEDCLI | ELISESLACP | PGA-----   | ---- |
| 54310496 | LRFGLEDCLI | ELISESLACP | PGA-----   | ---- |
| 90325648 | LRFGLEDNLI | ELISESLACP | PGA-----   | ---- |
| 85834299 | VRFEVEDNLI | QLIADSLAIP | PGA-----   | ---- |
| 53759093 | DRFKQEDRLI | KALQVVESLS | AQQV-----  | ---- |
| 89081955 | ERFELEDQMI | AVLHTSHKEL | VEG-----   | ---- |
| 59481112 | ARFELEDGLI | EQISSSLAHP | PGA-----   | ---- |
| 27360737 | LRFEVEDHLI | QLIADSLSVP | PGA-----   | ---- |
| 37681340 | LRFEVEDHLI | QLIADSLSVP | PGA-----   | ---- |
| 37200091 | LRFEVEDHLI | QLIADSLSVP | PGA-----   | ---- |
| 28807946 | TRFEVEDHLI | QLIADSLAMP | PGA-----   | ---- |
| 28899694 | TRFEVEDHLI | QLIADSLAMP | PGA-----   | ---- |
| 77385706 | ERFELEDCLI | EVLHTAHKEE | DSVQA----- | ---- |
| 63254034 | ERFELEDCLI | EVLHNSHKEE | IAAQV----- | ---- |
| 84376333 | ARFAVEDQLI | QQIADSLAVP | PGA-----   | ---- |
| 91187729 | TRFEVEDYLI | QQIAESLSMP | PGA-----   | ---- |
| 75854221 | TRFEVEDYLI | QQIAESLSMP | PGA-----   | ---- |
| 86164442 | ERFSFEDKLI | EELHEAHSEK | SA-----    | ---- |
| 32044633 | ERFELEDCLI | EVLHNAHSQS | GAEGSAVPV- | ---  |
| 84324040 | ERFELEDCLI | EVLHNAHSQS | GAEGSAVPV- | ---  |
| 84317875 | ERFELEDCLI | EVLHNAHSQS | GAEGSAVPV- | ---  |
| 94417731 | ERFELEDCLI | EVLHTAHSQS | DAEGSAVPV- | ---  |
| 91797860 | ERFALEDQLI | ARLHAAHAPS | HASEAASAPR | ALS  |
